# Supplementary material for: High pressure treatment promotes the deteriorating effect of cationic antimicrobial peptides on bacterial membranes
Source: Royal Society of Chemistry journal article supplement (doi:10.1039/d3cp00560g), 2023-01-01
Supplement: d3cp00560g1.pdf [file d3cp00560g1.pdf]

## Supporting Information

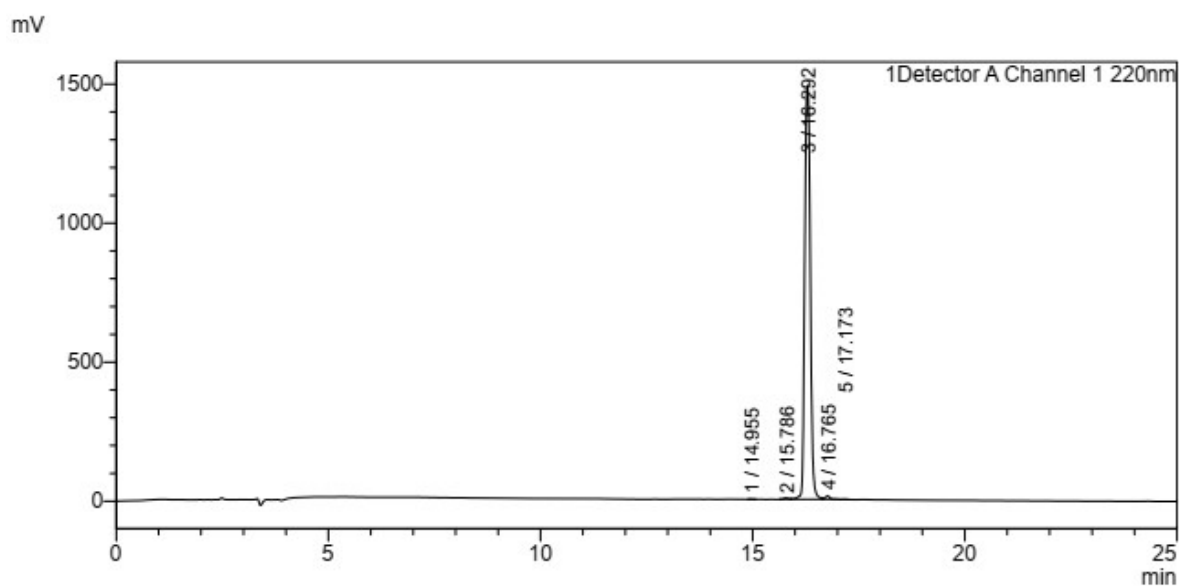

**Figure S1.** HPLC of the purified (P)GKY20 peptide provided by Genscript (Germany).

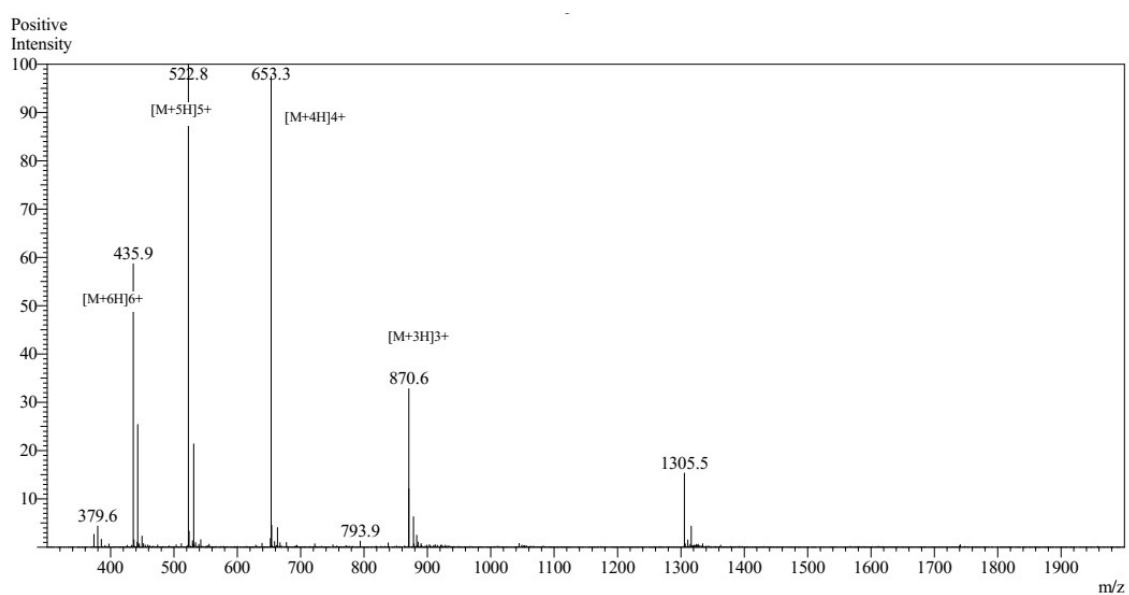

**Figure S2.** Mass spectrum (MS) of the purified (P)GKY20 peptide provided by Genscript (Germany). The value of the obtained mass is 2069.00 g mol<sup>-1</sup> (the theoretical one is 2069.13 g mol<sup>-1</sup>).

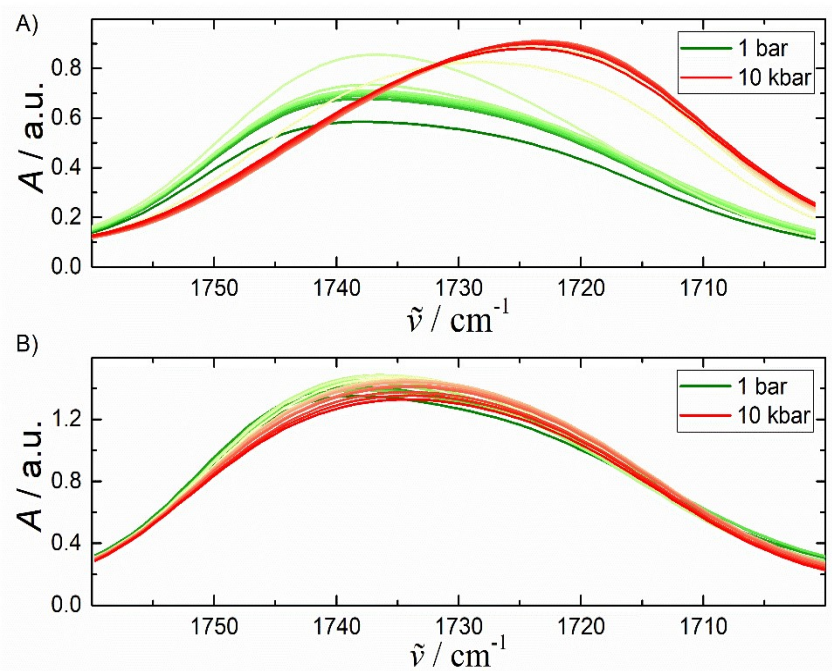

**Figure S3.** Pressure-dependent FT-IR spectra of the stretching band of the carbonyl (C=O) groups of DOPE:DOPG (80:20) vesicles in the absence (panel A) and in the presence (B) of (P)GKY20 peptide at the lipid-to-peptide ratio 50:1 ( $T = 25\text{ }^{\circ}\text{C}$ ).

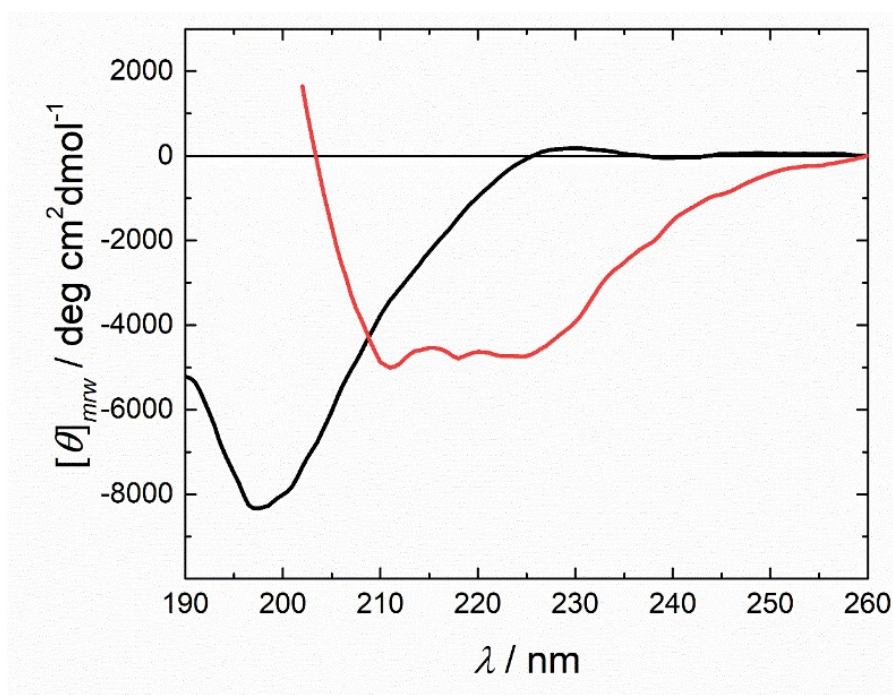

**Figure S4.** Circular dichroism spectra of (P)GKY20 peptide at the concentration of  $50\text{ }\mu\text{M}$  in neat buffer (black line) and in the presence of  $2.5\text{ mM}$  DOPE:DOPG large unilamellar vesicles (red line). The spectra were acquired by using a  $0.1\text{ cm}$  path length quartz cuvette at the temperature of  $25\text{ }^{\circ}\text{C}$ . Buffer:  $20\text{ mM}$  sodium phosphate, pH 7.4.
